# Supplementary material for: Trends in Clinical Characteristics and Prescribing Preferences for SGLT2 Inhibitors and GLP-1 Receptor Agonists, 2013–2018
Source: Oxford University Press journal article supplement (doi:10.2337/dc19-1943), 2020-02-10
Supplement: dc191943supplementarydata.pdf [file dc191943supplementarydata.pdf]

## SUPPLEMENTARY DATA

|                                | 2013,<br>2 <sup>nd</sup> half | 2014,<br>1 <sup>st</sup> half | 2014,<br>2 <sup>nd</sup> half | 2015,<br>1 <sup>st</sup> half | 2015,<br>2 <sup>nd</sup> half | 2016,<br>1 <sup>st</sup> half | 2016,<br>2 <sup>nd</sup> half | 2017,<br>1 <sup>st</sup> half | 2017,<br>2 <sup>nd</sup> half | 2018,<br>1 <sup>st</sup> half |
|--------------------------------|-------------------------------|-------------------------------|-------------------------------|-------------------------------|-------------------------------|-------------------------------|-------------------------------|-------------------------------|-------------------------------|-------------------------------|
| Number of patients             | 3,961                         | 5,885                         | 9,497                         | 11,330                        | 8,769                         | 8,979                         | 8,294                         | 11,392                        | 10,693                        | 11,296                        |
| Female                         | 1,708 (43.1)                  | 2,488 (42.3)                  | 4,039 (42.5)                  | 4,740 (41.8)                  | 3,773 (43.0)                  | 3,818 (42.5)                  | 3,628 (43.7)                  | 4,779 (42.0)                  | 4,524 (42.3)                  | 4,769 (42.2)                  |
| Age (mean, SD)                 | 55.7 (9.8)                    | 55.5 (9.9)                    | 55.6 (9.8)                    | 55.6 (10.0)                   | 55.7 (10.2)                   | 55.6 (10.1)                   | 55.7 (10.2)                   | 55.7 (10.2)                   | 56.0 (10.3)                   | 55.8 (10.3)                   |
| <b>Antidiabetic therapy</b>    |                               |                               |                               |                               |                               |                               |                               |                               |                               |                               |
| Metformin                      | 3,015 (76.1)                  | 4,719 (80.2)                  | 7,693 (81.0)                  | 9,086 (80.2)                  | 7,086 (80.8)                  | 7,178 (79.9)                  | 6,498 (78.3)                  | 8,837 (77.6)                  | 7,952 (74.4)                  | 8,855 (78.4)                  |
| Insulin                        | 1,214 (30.6)                  | 1,700 (28.9)                  | 2,764 (29.1)                  | 3,008 (26.5)                  | 2,065 (23.6)                  | 2,055 (22.9)                  | 1,825 (22.0)                  | 2,659 (23.3)                  | 2,375 (22.2)                  | 2,554 (22.6)                  |
| Number of DM drugs             | 2.4 (1.1)                     | 2.3 (1.1)                     | 2.2 (1.1)                     | 2.1 (1.1)                     | 2.0 (1.1)                     | 2.0 (1.1)                     | 2.0 (1.1)                     | 1.9 (1.1)                     | 1.9 (1.1)                     | 1.9 (1.1)                     |
| Therapy naïve                  | 179 (4.5)                     | 216 (3.7)                     | 414 (4.4)                     | 617 (5.4)                     | 557 (6.4)                     | 606 (6.8)                     | 704 (8.5)                     | 958 (8.4)                     | 1,054 (9.9)                   | 821 (7.3)                     |
| A1c (mean, SD) <sup>b</sup>    | 8.7 (1.8)                     | 8.8 (1.7)                     | 8.7 (1.8)                     | 8.8 (1.8)                     | 8.8 (1.8)                     | 8.9 (1.8)                     | 8.8 (1.8)                     | 8.9 (1.8)                     | 8.7 (1.8)                     | 8.8 (1.8)                     |
| eGFR (mean, SD) <sup>b</sup>   | 93.4 (24.1)                   | 94.9 (22.5)                   | 95.0 (22.3)                   | 94.2 (23.3)                   | 94.8 (23.1)                   | 94.0 (23.4)                   | 94.2 (24.1)                   | 94.6 (23.2)                   | 94.3 (23.6)                   | 93.8 (23.7)                   |
| <b>Cardiovascular severity</b> |                               |                               |                               |                               |                               |                               |                               |                               |                               |                               |
| MI or Stroke                   | 229 (5.8)                     | 353 (6.0)                     | 561 (5.9)                     | 684 (6.0)                     | 544 (6.2)                     | 612 (6.8)                     | 530 (6.4)                     | 825 (7.2)                     | 858 (8.0)                     | 983 (8.7)                     |
| Heart Failure                  | 156 (3.9)                     | 164 (2.8)                     | 305 (3.2)                     | 372 (3.3)                     | 301 (3.4)                     | 329 (3.7)                     | 314 (3.8)                     | 508 (4.5)                     | 547 (5.1)                     | 624 (5.5)                     |
| MI, stroke, or Heart Failure   | 348 (8.8)                     | 463 (7.9)                     | 776 (8.2)                     | 957 (8.4)                     | 750 (8.6)                     | 825 (9.2)                     | 740 (8.9)                     | 1,167 (10.2)                  | 1,212 (11.3)                  | 1,378 (12.2)                  |
| <b>Prescriber</b>              |                               |                               |                               |                               |                               |                               |                               |                               |                               |                               |
| Cardiologist                   | 13 (0.3)                      | 25 (0.4)                      | 44 (0.5)                      | 37 (0.3)                      | 45 (0.5)                      | 40 (0.5)                      | 43 (0.5)                      | 83 (0.7)                      | 110 (1.0)                     | 122 (1.1)                     |
| Endocrinologist                | 1,091 (27.5)                  | 1,344 (22.8)                  | 1,815 (19.1)                  | 1,946 (17.2)                  | 1,317 (15.0)                  | 1,455 (16.2)                  | 1,277 (15.4)                  | 1,692 (14.8)                  | 1,648 (15.4)                  | 1,753 (15.5)                  |
| Internal Medicine              | 2,216 (55.9)                  | 3,439 (58.4)                  | 5,872 (61.8)                  | 7,107 (62.7)                  | 5,580 (63.6)                  | 5,442 (60.6)                  | 4,950 (59.7)                  | 6,989 (61.3)                  | 6,431 (60.1)                  | 6,650 (58.9)                  |
| NP or PA                       | 389 (9.8)                     | 680 (11.6)                    | 1,142 (12.0)                  | 1,528 (13.5)                  | 1,285 (14.7)                  | 1,441 (16.1)                  | 1,439 (17.3)                  | 1,999 (17.5)                  | 1,835 (17.2)                  | 2,024 (17.9)                  |
| Other physician                | 257 (6.5)                     | 407 (6.9)                     | 648 (6.8)                     | 739 (6.5)                     | 557 (6.3)                     | 619 (6.9)                     | 601 (7.2)                     | 661 (5.8)                     | 693 (6.5)                     | 757 (6.7)                     |

Abbreviation: A1c: Hemoglobin A1c; DM: Diabetes Mellitus; eGFR: estimated Glomerular Filtration Rate; MI: Myocardial Infarction; NP: Nurse Practitioner; PA: Physician Assistant SD: Standard Deviation;

<sup>a</sup> Patients could contribute to more than one drug-cohort (e.g. patient could be included in the SGLT2i and the GLP1-RA cohort as long as the inclusion and exclusion criteria were met at the time of medication initiation). The prevalence of dual use of SGLT2i and GLP1-RA was as follows: over the five-year period, 783 patients initiated SGLT2i and GLP1-RA concomitantly, 8,040 patients first initiated an SGLT2i followed by GLP1-RA, and 7,767 patients initiated a GLP1-RA followed by a SGLT2i.

<sup>b</sup> Information on A1c and eGFR was available for 48% and 50% of the patients respectively.

## SUPPLEMENTARY DATA

|                                | 2013,<br>2 <sup>nd</sup> half | 2014,<br>1 <sup>st</sup> half | 2014,<br>2 <sup>nd</sup> half | 2015,<br>1 <sup>st</sup> half | 2015,<br>2 <sup>nd</sup> half | 2016,<br>1 <sup>st</sup> half | 2016,<br>2 <sup>nd</sup> half | 2017,<br>1 <sup>st</sup> half | 2017,<br>2 <sup>nd</sup> half | 2018,<br>1 <sup>st</sup> half |
|--------------------------------|-------------------------------|-------------------------------|-------------------------------|-------------------------------|-------------------------------|-------------------------------|-------------------------------|-------------------------------|-------------------------------|-------------------------------|
| Number of patients             | 139 (39.9)                    | 194 (41.8)                    | 300 (38.7)                    | 364 (38.0)                    | 294 (39.2)                    | 325 (39.4)                    | 273 (36.9)                    | 466 (39.9)                    | 488 (40.3)                    | 559 (40.6)                    |
| Female                         | 61.6 (9.4)                    | 61.2 (9.9)                    | 60.7 (9.9)                    | 61.3 (9.4)                    | 61.3 (9.5)                    | 60.7 (9.3)                    | 60.8 (9.7)                    | 60.7 (9.0)                    | 61.0 (9.1)                    | 60.6 (8.8)                    |
| Age (mean, SD)                 |                               |                               |                               |                               |                               |                               |                               |                               |                               |                               |
| <b>Antidiabetic therapy</b>    |                               |                               |                               |                               |                               |                               |                               |                               |                               |                               |
| Metformin                      | 244 (70.1)                    | 339 (73.2)                    | 592 (76.3)                    | 725 (75.7)                    | 565 (75.3)                    | 633 (76.8)                    | 556 (75.2)                    | 873 (74.8)                    | 839 (69.2)                    | 1,029 (74.7)                  |
| Insulin                        | 139 (39.9)                    | 190 (41.0)                    | 299 (38.5)                    | 363 (37.9)                    | 280 (37.3)                    | 283 (34.3)                    | 235 (31.7)                    | 417 (35.7)                    | 432 (35.6)                    | 469 (34.0)                    |
| Number of DM drugs             | 2.4 (1.2)                     | 2.4 (1.1)                     | 2.3 (1.1)                     | 2.2 (1.0)                     | 2.2 (1.0)                     | 2.1 (1.0)                     | 2.1 (1.0)                     | 2.0 (1.0)                     | 2.0 (1.0)                     | 2.0 (1.0)                     |
| Therapy naïve                  | 11 (3.2)                      | 8 (1.8)                       | 29 (3.7)                      | 38 (4.0)                      | 32 (4.2)                      | 29 (3.6)                      | 39 (5.3)                      | 69 (5.9)                      | 101 (8.4)                     | 74 (5.4)                      |
| A1c (mean, SD) <sup>b</sup>    | 8.9 (1.7)                     | 8.7 (1.6)                     | 8.7 (1.8)                     | 8.8 (1.6)                     | 8.8 (1.8)                     | 8.9 (1.8)                     | 8.8 (1.6)                     | 8.8 (1.7)                     | 8.5 (1.6)                     | 8.7 (1.6)                     |
| eGFR (mean, SD) <sup>b</sup>   | 84.9 (25.1)                   | 87.1 (23.0)                   | 88.7 (24.3)                   | 89.1 (21.0)                   | 89.9 (21.0)                   | 88.9 (20.9)                   | 90.6 (21.8)                   | 89.8 (20.5)                   | 88.0 (21.0)                   | 88.6 (20.2)                   |
| <b>Cardiovascular severity</b> |                               |                               |                               |                               |                               |                               |                               |                               |                               |                               |
| MI or Stroke                   | 229 (65.8)                    | 353 (76.1)                    | 561 (72.3)                    | 684 (71.5)                    | 544 (72.5)                    | 612 (74.2)                    | 530 (71.6)                    | 825 (70.6)                    | 858 (70.8)                    | 983 (71.4)                    |
| Heart Failure                  | 156 (44.8)                    | 164 (35.4)                    | 305 (39.3)                    | 372 (38.9)                    | 301 (40.1)                    | 329 (39.9)                    | 314 (42.4)                    | 508 (43.5)                    | 547 (45.2)                    | 624 (45.3)                    |
| MI, stroke, or Heart Failure   | 348 (100)                     | 463 (100)                     | 776 (100)                     | 957 (100)                     | 750 (100)                     | 825 (100)                     | 740 (100)                     | 1,167 (100)                   | 1,212 (100)                   | 1,378 (100)                   |
| <b>Prescriber</b>              |                               |                               |                               |                               |                               |                               |                               |                               |                               |                               |
| Cardiologist                   | 5 (1.4)                       | 9 (2.0)                       | 10 (1.3)                      | 13 (1.3)                      | 14 (1.9)                      | 11 (1.3)                      | 11 (1.5)                      | 22 (1.8)                      | 49 (4.1)                      | 50 (3.6)                      |
| Endocrinologist                | 96 (27.6)                     | 106 (22.9)                    | 172 (22.1)                    | 159 (16.6)                    | 146 (19.4)                    | 144 (17.5)                    | 127 (17.2)                    | 187 (16.0)                    | 224 (18.5)                    | 261 (18.9)                    |
| Internal Medicine              | 201 (57.8)                    | 268 (57.9)                    | 461 (59.4)                    | 602 (62.9)                    | 445 (59.2)                    | 512 (62.1)                    | 442 (59.8)                    | 699 (59.9)                    | 695 (57.3)                    | 732 (53.1)                    |
| NP or PA                       | 33 (9.5)                      | 54 (11.6)                     | 87 (11.2)                     | 129 (13.5)                    | 111 (14.8)                    | 103 (12.5)                    | 107 (14.4)                    | 195 (16.7)                    | 169 (13.9)                    | 253 (18.4)                    |
| Other physician                | 13 (3.7)                      | 28 (5.9)                      | 50 (6.4)                      | 58 (6.0)                      | 35 (4.6)                      | 56 (6.8)                      | 54 (7.3)                      | 68 (5.8)                      | 75 (6.2)                      | 84 (6.1)                      |

Abbreviation: DM: Diabetes Mellitus; NP: Nurse Practitioner; PA: Physician Assistant SD: Standard Deviation;

<sup>a</sup> Data for select time periods are shown. See appendix for data for all periods.

<sup>b</sup> Information on A1c and eGFR was available for 48% and 50% of the patients respectively.

## SUPPLEMENTARY DATA

|                                | 2013,<br>2 <sup>nd</sup> half | 2014,<br>1 <sup>st</sup> half | 2014,<br>2 <sup>nd</sup> half | 2015,<br>1 <sup>st</sup> half | 2015,<br>2 <sup>nd</sup> half | 2016,<br>1 <sup>st</sup> half | 2016,<br>2 <sup>nd</sup> half | 2017,<br>1 <sup>st</sup> half | 2017,<br>2 <sup>nd</sup> half | 2018,<br>1 <sup>st</sup> half |
|--------------------------------|-------------------------------|-------------------------------|-------------------------------|-------------------------------|-------------------------------|-------------------------------|-------------------------------|-------------------------------|-------------------------------|-------------------------------|
| Number of patients             | 5,066                         | 4,752                         | 4,131                         | 4,923                         | 5,840                         | 6,878                         | 6,678                         | 9,898                         | 10,537                        | 12,638                        |
| Female                         | 2,589 (51.1)                  | 2,386 (50.2)                  | 2,147 (52.0)                  | 2,524 (51.3)                  | 2,980 (51.0)                  | 3,584 (52.1)                  | 3,523 (52.7)                  | 5,077 (51.3)                  | 5,502 (52.2)                  | 6,289 (49.8)                  |
| Age (mean, SD)                 | 55.9 (11.2)                   | 55.8 (11.2)                   | 56.1 (11.3)                   | 55.8 (11.3)                   | 56.0 (11.4)                   | 55.9 (11.4)                   | 56.0 (11.7)                   | 55.9 (11.6)                   | 56.2 (11.7)                   | 56.2 (11.6)                   |
| <b>Antidiabetic therapy</b>    |                               |                               |                               |                               |                               |                               |                               |                               |                               |                               |
| Metformin                      | 3,716 (73.3)                  | 3,583 (75.4)                  | 3,098 (75.0)                  | 3,644 (74.0)                  | 4,409 (75.5)                  | 5,105 (74.2)                  | 5,059 (75.8)                  | 7,267 (73.4)                  | 7,611 (72.2)                  | 9,457 (74.8)                  |
| Insulin                        | 1,494 (29.5)                  | 1,456 (30.7)                  | 1,428 (34.6)                  | 1,804 (36.7)                  | 1,995 (34.2)                  | 2,267 (33.0)                  | 2,123 (31.8)                  | 3,323 (33.6)                  | 3,370 (32.0)                  | 4,233 (33.5)                  |
| Number of DM drugs             | 2.0 (1.1)                     | 2.0 (1.1)                     | 2.0 (1.1)                     | 2.1 (1.1)                     | 2.1 (1.1)                     | 2.0 (1.2)                     | 2.0 (1.1)                     | 2.0 (1.1)                     | 1.9 (1.1)                     | 2.0 (1.1)                     |
| Therapy naïve                  | 441 (8.7)                     | 371 (7.8)                     | 304 (7.4)                     | 380 (7.7)                     | 431 (7.4)                     | 623 (9.1)                     | 532 (8.0)                     | 863 (8.7)                     | 1,077 (10.2)                  | 941 (7.4)                     |
| A1c (mean, SD) <sup>b</sup>    | 8.7 (1.9)                     | 8.9 (1.9)                     | 8.9 (1.9)                     | 8.8 (1.9)                     | 8.7 (1.9)                     | 8.8 (1.9)                     | 8.8 (1.9)                     | 8.8 (1.8)                     | 8.8 (1.9)                     | 8.8 (1.9)                     |
| eGFR (mean, SD) <sup>b</sup>   | 91.6 (24.0)                   | 90.4 (24.9)                   | 89.7 (25.1)                   | 89.6 (24.9)                   | 89.1 (25.4)                   | 88.9 (25.4)                   | 88.9 (26.3)                   | 89.3 (25.4)                   | 88.6 (26.0)                   | 89.5 (25.5)                   |
| <b>Cardiovascular severity</b> |                               |                               |                               |                               |                               |                               |                               |                               |                               |                               |
| MI or Stroke                   | 351 (6.9)                     | 382 (8.0)                     | 324 (7.8)                     | 408 (8.3)                     | 418 (7.2)                     | 536 (7.8)                     | 538 (8.1)                     | 863 (8.7)                     | 992 (9.4)                     | 1,215 (9.6)                   |
| Heart Failure                  | 260 (5.1)                     | 241 (5.1)                     | 206 (5.0)                     | 281 (5.7)                     | 307 (5.3)                     | 362 (5.3)                     | 361 (5.4)                     | 667 (6.7)                     | 700 (6.6)                     | 918 (7.3)                     |
| MI, stroke, or Heart Failure   | 531 (10.5)                    | 550 (11.6)                    | 466 (11.3)                    | 596 (12.1)                    | 643 (11.0)                    | 785 (11.4)                    | 775 (11.6)                    | 1,307 (13.2)                  | 1,451 (13.8)                  | 1,820 (14.4)                  |
| <b>Prescriber</b>              |                               |                               |                               |                               |                               |                               |                               |                               |                               |                               |
| Cardiologist                   | 25 (0.5)                      | 18 (0.4)                      | 11 (0.3)                      | 21 (0.4)                      | 24 (0.4)                      | 27 (0.4)                      | 24 (0.4)                      | 29 (0.3)                      | 25 (0.2)                      | 40 (0.3)                      |
| Endocrinologist                | 1,076 (21.2)                  | 1,016 (21.4)                  | 906 (21.9)                    | 1,076 (21.9)                  | 1,254 (21.5)                  | 1,413 (20.5)                  | 1,357 (20.3)                  | 1,789 (18.1)                  | 1,821 (17.3)                  | 2,081 (16.5)                  |
| Internal Medicine              | 2,927 (57.8)                  | 2,797 (58.9)                  | 2,316 (56.1)                  | 2,720 (55.2)                  | 3,241 (55.5)                  | 3,832 (55.7)                  | 3,633 (54.4)                  | 5,606 (56.6)                  | 5,909 (56.1)                  | 7,052 (55.8)                  |
| NP or PA                       | 639 (12.6)                    | 620 (13.1)                    | 582 (14.1)                    | 754 (15.3)                    | 903 (15.5)                    | 1,108 (16.1)                  | 1,151 (17.2)                  | 1,865 (18.8)                  | 2,103 (20.0)                  | 2,608 (20.6)                  |
| Other physician                | 412 (8.1)                     | 314 (6.6)                     | 326 (7.9)                     | 364 (7.4)                     | 429 (7.3)                     | 517 (7.5)                     | 538 (8.1)                     | 637 (6.4)                     | 713 (6.8)                     | 883 (7.0)                     |

Abbreviation: A1c: Hemoglobin A1c; DM: Diabetes Mellitus; eGFR: estimated Glomerular Filtration Rate; MI: Myocardial Infarction; NP: Nurse Practitioner; PA: Physician Assistant SD: Standard Deviation;

<sup>a</sup> Patients could contribute to more than one drug-cohort (e.g. patient could be included in the SGLT2i and the GLP1-RA cohort as long as the inclusion and exclusion criteria were met at the time of medication initiation). The prevalence of dual use of SGLT2i and GLP1-RA was as follows: over the five-year period, 783 patients initiated SGLT2i and GLP1-RA concomitantly, 8,040 patients first initiated an SGLT2i followed by GLP1-RA, and 7,767 patients initiated a GLP1-RA followed by a SGLT2i.

<sup>b</sup> Information on A1c and eGFR was available for 45% and 48% of the patients respectively.

## SUPPLEMENTARY DATA

| Supplementary Table 4: Trends in the baseline characteristics of patients initiating an GLP-1RA with baseline history of MI, stroke or HF                                                                |                               |                               |                               |                               |                               |                               |                               |                               |                               |                               |
|----------------------------------------------------------------------------------------------------------------------------------------------------------------------------------------------------------|-------------------------------|-------------------------------|-------------------------------|-------------------------------|-------------------------------|-------------------------------|-------------------------------|-------------------------------|-------------------------------|-------------------------------|
|                                                                                                                                                                                                          | 2013,<br>2 <sup>nd</sup> half | 2014,<br>1 <sup>st</sup> half | 2014,<br>2 <sup>nd</sup> half | 2015,<br>1 <sup>st</sup> half | 2015,<br>2 <sup>nd</sup> half | 2016,<br>1 <sup>st</sup> half | 2016,<br>2 <sup>nd</sup> half | 2017,<br>1 <sup>st</sup> half | 2017,<br>2 <sup>nd</sup> half | 2018,<br>1 <sup>st</sup> half |
| Number of patients                                                                                                                                                                                       | 531                           | 550                           | 466                           | 596                           | 643                           | 785                           | 775                           | 1,307                         | 1,451                         | 1,820                         |
| Female                                                                                                                                                                                                   | 261 (49.2)                    | 247 (45.0)                    | 229 (49.2)                    | 279 (46.8)                    | 298 (46.3)                    | 380 (48.4)                    | 376 (48.4)                    | 624 (47.7)                    | 714 (49.2)                    | 840 (46.1)                    |
| Age (mean, SD)                                                                                                                                                                                           | 61.7 (10.8)                   | 62.4 (10.3)                   | 63.1 (10.5)                   | 62.6 (10.2)                   | 62.3 (10.5)                   | 62.1 (10.1)                   | 62.7 (10.1)                   | 62.1 (10.0)                   | 62.3 (9.6)                    | 61.9 (9.5)                    |
| <b>Antidiabetic therapy</b>                                                                                                                                                                              |                               |                               |                               |                               |                               |                               |                               |                               |                               |                               |
| Metformin                                                                                                                                                                                                | 339 (63.8)                    | 368 (67.0)                    | 309 (66.3)                    | 406 (68.2)                    | 440 (68.4)                    | 525 (66.9)                    | 517 (66.6)                    | 846 (64.7)                    | 943 (65.0)                    | 1,216 (66.8)                  |
| Insulin                                                                                                                                                                                                  | 207 (39.0)                    | 240 (43.7)                    | 229 (49.1)                    | 310 (52.0)                    | 293 (45.6)                    | 388 (49.5)                    | 370 (47.8)                    | 650 (49.7)                    | 663 (45.7)                    | 891 (49.0)                    |
| Number of DM drugs                                                                                                                                                                                       | 2.0 (1.1)                     | 2.1 (1.0)                     | 2.0 (1.1)                     | 2.1 (1.1)                     | 2.1 (1.1)                     | 2.1 (1.1)                     | 2.1 (1.1)                     | 2.0 (1.0)                     | 2.0 (1.1)                     | 2.1 (1.0)                     |
| Therapy naïve                                                                                                                                                                                            | 35 (6.6)                      | 32 (5.7)                      | 29 (6.2)                      | 34 (5.7)                      | 37 (5.7)                      | 45 (5.8)                      | 45 (5.8)                      | 77 (5.9)                      | 136 (9.3)                     | 98 (5.4)                      |
| A1c (mean, SD) <sup>b</sup>                                                                                                                                                                              | 8.5 (1.9)                     | 8.8 (1.8)                     | 8.7 (1.9)                     | 8.7 (1.9)                     | 8.7 (2.0)                     | 8.7 (1.8)                     | 8.8 (1.7)                     | 8.8 (1.7)                     | 8.7 (1.7)                     | 8.8 (1.7)                     |
| eGFR (mean, SD) <sup>b</sup>                                                                                                                                                                             | 83.8 (25.5)                   | 80.6 (26.9)                   | 81.2 (24.1)                   | 79.2 (25.1)                   | 80.2 (26.3)                   | 79.6 (24.5)                   | 80.5 (25.7)                   | 81.8 (23.8)                   | 80.0 (24.1)                   | 82.0 (23.8)                   |
| <b>Cardiovascular severity</b>                                                                                                                                                                           |                               |                               |                               |                               |                               |                               |                               |                               |                               |                               |
| MI or Stroke                                                                                                                                                                                             | 351 (66.1)                    | 382 (69.6)                    | 324 (69.5)                    | 408 (68.4)                    | 418 (65.0)                    | 536 (68.3)                    | 538 (69.4)                    | 863 (66.0)                    | 992 (68.4)                    | 1,215 (66.8)                  |
| Heart Failure                                                                                                                                                                                            | 260 (49.0)                    | 241 (43.8)                    | 206 (44.1)                    | 281 (47.2)                    | 307 (47.8)                    | 362 (46.1)                    | 361 (46.6)                    | 667 (51.0)                    | 700 (48.2)                    | 918 (50.4)                    |
| MI, stroke, or Heart Failure                                                                                                                                                                             | 531 (100)                     | 550 (100)                     | 466 (100)                     | 596 (100)                     | 643 (100)                     | 785 (100)                     | 775 (100)                     | 1,307 (100)                   | 1,451 (100)                   | 1,820 (100)                   |
| <b>Prescriber</b>                                                                                                                                                                                        |                               |                               |                               |                               |                               |                               |                               |                               |                               |                               |
| Cardiologist                                                                                                                                                                                             | 8 (1.5)                       | 10 (1.9)                      | 5 (1.1)                       | 3 (0.4)                       | 9 (1.4)                       | 6 (0.7)                       | 5 (0.6)                       | 6 (0.4)                       | 7 (0.5)                       | 14 (0.8)                      |
| Endocrinologist                                                                                                                                                                                          | 98 (18.5)                     | 107 (19.5)                    | 103 (22.2)                    | 138 (23.1)                    | 168 (26.2)                    | 171 (21.8)                    | 150 (19.4)                    | 244 (18.6)                    | 265 (18.3)                    | 351 (19.3)                    |
| Internal Medicine                                                                                                                                                                                        | 336 (63.3)                    | 331 (60.3)                    | 264 (56.6)                    | 335 (56.2)                    | 344 (53.5)                    | 442 (56.3)                    | 421 (54.3)                    | 737 (56.4)                    | 815 (56.2)                    | 991 (54.4)                    |
| NP or PA                                                                                                                                                                                                 | 49 (9.2)                      | 74 (13.4)                     | 59 (12.7)                     | 83 (13.9)                     | 80 (12.5)                     | 116 (14.7)                    | 140 (18.1)                    | 245 (18.7)                    | 268 (18.5)                    | 337 (18.5)                    |
| Other physician                                                                                                                                                                                          | 40 (7.5)                      | 30 (5.4)                      | 35 (7.4)                      | 41 (6.9)                      | 41 (6.4)                      | 51 (6.5)                      | 61 (7.9)                      | 78 (6.0)                      | 98 (6.8)                      | 134 (7.3)                     |
| Abbreviation: A1c: Hemoglobin A1c; DM: Diabetes Mellitus; eGFR: estimated Glomerular Filtration Rate; MI: Myocardial Infarction; NP: Nurse Practitioner; PA: Physician Assistant SD: Standard Deviation; |                               |                               |                               |                               |                               |                               |                               |                               |                               |                               |
| <sup>a</sup> Data for select time periods are shown. See appendix for data for all periods.                                                                                                              |                               |                               |                               |                               |                               |                               |                               |                               |                               |                               |
| <sup>b</sup> Information on A1c and eGFR was available for 48% and 50% of the patients respectively.                                                                                                     |                               |                               |                               |                               |                               |                               |                               |                               |                               |                               |

## SUPPLEMENTARY DATA

|                                                                                                                                                                                                                                                                                                                                      | 2013,<br>2 <sup>nd</sup> half | 2014,<br>1 <sup>st</sup> half | 2014,<br>2 <sup>nd</sup> half | 2015,<br>1 <sup>st</sup> half | 2015,<br>2 <sup>nd</sup> half | 2016,<br>1 <sup>st</sup> half | 2016,<br>2 <sup>nd</sup> half | 2017,<br>1 <sup>st</sup> half | 2017,<br>2 <sup>nd</sup> half | 2018,<br>1 <sup>st</sup> half |
|--------------------------------------------------------------------------------------------------------------------------------------------------------------------------------------------------------------------------------------------------------------------------------------------------------------------------------------|-------------------------------|-------------------------------|-------------------------------|-------------------------------|-------------------------------|-------------------------------|-------------------------------|-------------------------------|-------------------------------|-------------------------------|
| Number of patients                                                                                                                                                                                                                                                                                                                   | 33,222                        | 30,934                        | 27,048                        | 28,558                        | 25,106                        | 29,196                        | 25,893                        | 34,696                        | 36,695                        | 36,298                        |
| Female                                                                                                                                                                                                                                                                                                                               | 15,109<br>(45.5)              | 13,701<br>(44.3)              | 12,358<br>(45.7)              | 12,712<br>(44.5)              | 11,312<br>(45.1)              | 13,204<br>(45.2)              | 11,851<br>(45.8)              | 16,075<br>(46.3)              | 17,203<br>(46.9)              | 16,390<br>(45.2)              |
| Age (mean, SD)                                                                                                                                                                                                                                                                                                                       | 61.0 (12.8)                   | 60.8 (12.8)                   | 61.0 (12.9)                   | 60.8 (12.7)                   | 61.0 (12.9)                   | 60.8 (12.9)                   | 61.0 (12.9)                   | 60.7 (12.8)                   | 61.2 (12.9)                   | 60.9 (12.7)                   |
| <b>Antidiabetic therapy</b>                                                                                                                                                                                                                                                                                                          |                               |                               |                               |                               |                               |                               |                               |                               |                               |                               |
| Metformin                                                                                                                                                                                                                                                                                                                            | 21,173<br>(63.7)              | 20,381<br>(65.9)              | 18,453<br>(68.2)              | 19,570<br>(68.5)              | 17,502<br>(69.7)              | 19,923<br>(68.2)              | 17,995<br>(69.5)              | 24,069<br>(69.4)              | 23,468<br>(64.0)              | 25,780<br>(71.0)              |
| Insulin                                                                                                                                                                                                                                                                                                                              | 3,770 (11.3)                  | 3,511 (11.4)                  | 3,218 (11.9)                  | 3,530 (12.4)                  | 3,114 (12.4)                  | 3,425 (11.7)                  | 3,128 (12.1)                  | 4,481 (12.9)                  | 4,423 (12.1)                  | 4,764 (13.1)                  |
| Number of DM drugs                                                                                                                                                                                                                                                                                                                   | 1.1 (0.9)                     | 1.1 (0.9)                     | 1.2 (0.9)                     | 1.2 (0.9)                     | 1.2 (0.9)                     | 1.2 (0.9)                     | 1.2 (0.9)                     | 1.2 (0.9)                     | 1.1 (0.9)                     | 1.3 (0.9)                     |
| Therapy naïve                                                                                                                                                                                                                                                                                                                        | 8,143 (24.5)                  | 7,277 (23.5)                  | 5,730 (21.2)                  | 6,077 (21.3)                  | 5,009 (20.0)                  | 6,194 (21.2)                  | 5,253 (20.3)                  | 6,770 (19.5)                  | 9,331 (25.4)                  | 6,490 (17.9)                  |
| A1c (mean, SD) <sup>b</sup>                                                                                                                                                                                                                                                                                                          | 8.5 (1.9)                     | 8.6 (1.9)                     | 8.6 (1.9)                     | 8.6 (1.9)                     | 8.6 (1.9)                     | 8.6 (1.9)                     | 8.6 (1.8)                     | 8.7 (1.9)                     | 8.5 (1.9)                     | 8.7 (1.9)                     |
| eGFR (mean, SD) <sup>b</sup>                                                                                                                                                                                                                                                                                                         | 87.4 (25.7)                   | 87.3 (25.8)                   | 86.5 (26.2)                   | 86.8 (26.0)                   | 86.4 (25.4)                   | 86.7 (25.7)                   | 86.7 (25.7)                   | 86.6 (25.9)                   | 85.9 (25.9)                   | 86.5 (25.9)                   |
| <b>Cardiovascular severity</b>                                                                                                                                                                                                                                                                                                       |                               |                               |                               |                               |                               |                               |                               |                               |                               |                               |
| MI or Stroke                                                                                                                                                                                                                                                                                                                         | 3,206 (9.7)                   | 3,099 (10.0)                  | 2,558 (9.5)                   | 2,798 (9.8)                   | 2,484 (9.9)                   | 2,824 (9.7)                   | 2,384 (9.2)                   | 3,431 (9.9)                   | 3,583 (9.8)                   | 3,833 (10.6)                  |
| Heart Failure                                                                                                                                                                                                                                                                                                                        | 2,066 (6.2)                   | 1,992 (6.4)                   | 1,652 (6.1)                   | 1,859 (6.5)                   | 1,604 (6.4)                   | 1,878 (6.4)                   | 1,627 (6.3)                   | 2,422 (7.0)                   | 2,690 (7.3)                   | 2,763 (7.6)                   |
| MI, stroke, or Heart Failure                                                                                                                                                                                                                                                                                                         | 4,592 (13.8)                  | 4,366 (14.1)                  | 3,623 (13.4)                  | 4,000 (14.0)                  | 3,524 (14.0)                  | 4,071 (13.9)                  | 3,442 (13.3)                  | 5,000 (14.4)                  | 5,323 (14.5)                  | 5,559 (15.3)                  |
| <b>Prescriber</b>                                                                                                                                                                                                                                                                                                                    |                               |                               |                               |                               |                               |                               |                               |                               |                               |                               |
| Cardiologist                                                                                                                                                                                                                                                                                                                         | 366 (1.1)                     | 332 (1.1)                     | 294 (1.1)                     | 285 (1.0)                     | 221 (0.9)                     | 285 (1.0)                     | 213 (0.8)                     | 260 (0.7)                     | 256 (0.7)                     | 226 (0.6)                     |
| Endocrinologist                                                                                                                                                                                                                                                                                                                      | 3,106 (9.4)                   | 2,935 (9.5)                   | 2,452 (9.1)                   | 2,467 (8.6)                   | 2,329 (9.3)                   | 2,519 (8.6)                   | 2,147 (8.3)                   | 2,648 (7.6)                   | 2,590 (7.1)                   | 2,709 (7.5)                   |
| Internal Medicine                                                                                                                                                                                                                                                                                                                    | 25,005<br>(75.3)              | 23,219<br>(75.1)              | 20,199<br>(74.7)              | 21,435<br>(75.1)              | 18,582<br>(74.0)              | 21,461<br>(73.5)              | 18,956<br>(73.2)              | 25,340<br>(73.0)              | 26,877<br>(73.2)              | 26,107<br>(71.9)              |
| NP or PA                                                                                                                                                                                                                                                                                                                             | 3,867 (11.6)                  | 3,904 (12.6)                  | 3,636 (13.4)                  | 3,962 (13.9)                  | 3,579 (14.3)                  | 4,461 (15.3)                  | 4,033 (15.6)                  | 5,930 (17.1)                  | 6,326 (17.2)                  | 6,211 (17.1)                  |
| Other physician                                                                                                                                                                                                                                                                                                                      | 2,072 (6.2)                   | 1,775 (5.7)                   | 1,553 (5.7)                   | 1,539 (5.4)                   | 1,396 (5.6)                   | 1,609 (5.5)                   | 1,528 (5.9)                   | 1,769 (5.1)                   | 1,931 (5.3)                   | 2,064 (5.7)                   |
| Abbreviation: A1c: Hemoglobin A1c; DM: Diabetes Mellitus; eGFR: estimated Glomerular Filtration Rate; MI: Myocardial Infarction; NP: Nurse Practitioner; PA: Physician Assistant SD: Standard Deviation;                                                                                                                             |                               |                               |                               |                               |                               |                               |                               |                               |                               |                               |
| <sup>a</sup> Patients could contribute to more than one drug-cohort as long as the inclusion and exclusion criteria were met at the time of medication initiation. For instance, 26,867 patients were included in the analysis for the SGLT2i cohort and this cohort, and 25,328 were included in the GLP-RA cohort and this cohort. |                               |                               |                               |                               |                               |                               |                               |                               |                               |                               |
| <sup>b</sup> Information on A1c and eGFR was available for 46% and 49% of the patients respectively.                                                                                                                                                                                                                                 |                               |                               |                               |                               |                               |                               |                               |                               |                               |                               |

SUPPLEMENTARY DATA

Supplementary Figure 1. Changes in prescribing patterns for SGLT2i and GLP-1RA in patients with history of MI, stroke, or HF

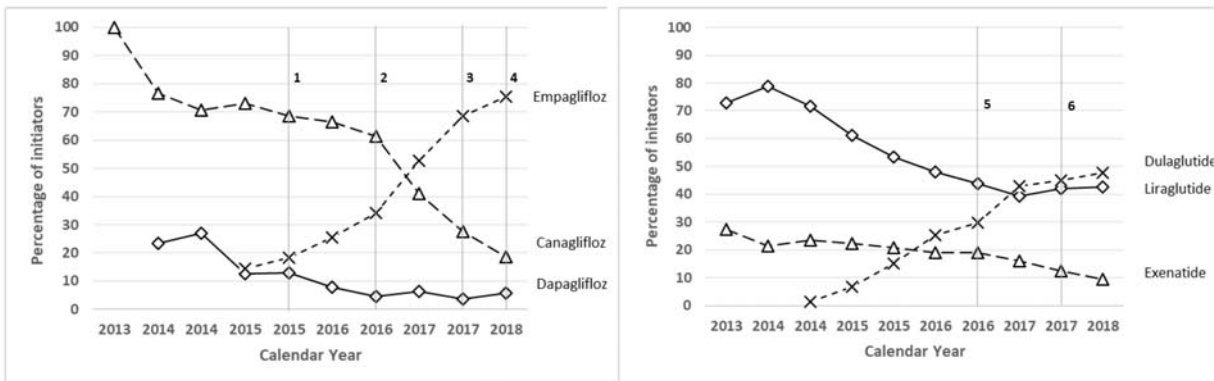

SGLT2i: Sodium glucose cotransporter 2 inhibitors; GLP-1RA: Glucagon-like peptide-1 receptor agonist; MI: myocardial infarction; HF: heart failure.

Figure 1 description: The figure describes the proportion of patients initiating individual SGLT2 inhibitors between July 2013 to June 2018.

1 - EMPA-REG is published showing benefits in composite of CVD death, nonfatal stroke and MI.

2 - Empagliflozin receives a new FDA indication for reduction in cardiovascular death in patients with established cardiovascular disease; 3 - CANVAS is published showing a benefit on the composite of CVD death, nonfatal, stroke and MI but the trial also found an increase in the risk of amputations resulting in a black box warning for canagliflozin

4 - 2018 American Diabetes Association guidelines recommend an SGLT2 inhibitor (with a focus on empagliflozin) as 2<sup>nd</sup> line therapy in patients with established cardiovascular disease.

5- LEADER is published showing benefits in cardiovascular death, and nonfatal stroke and MI for liraglutide. SUSTAIN-6 is also published showing benefit in cardiovascular death, and nonfatal stroke and MI.

6- Liraglutide receives a new indication for reduction in cardiovascular events in patients with established cardiovascular disease; EXSCEL is published showing no cardiovascular benefit for exenatide
